# Supplementary material for: Coating oil droplets with rice proteins to control the release rate of encapsulated beta-carotene during in vitro digestion
Source: Royal Society of Chemistry journal article supplement (doi:10.1039/c6ra14943j), 2016-01-01
Supplement: c6ra14943j1.pdf [file c6ra14943j1.pdf]

## Coating oil droplets with rice proteins to control the release rate of encapsulated beta-carotene during *in vitro* digestions

Tao Wang<sup>a,b</sup>, Ren Wang<sup>a</sup>, Zhengxing Chen<sup>\*a</sup>, and Qixin Zhong<sup>\*b</sup>

<sup>a</sup> State Key Laboratory of Food Science and Technology, National Engineering Laboratory for Cereal Fermentation Technology, and School of Science and Technology, Jiangnan University, Wuxi 214122, PRC.

<sup>b</sup> Department of Food Science and Technology, University of Tennessee, Knoxville, TN, 37996-4539, USA.

E-mail: [zxchen\\_2008@126.com](mailto:zxchen_2008@126.com) (Z. Chen), [qzhong@utk.edu](mailto:qzhong@utk.edu) (Q. Zhong)

### Supporting information

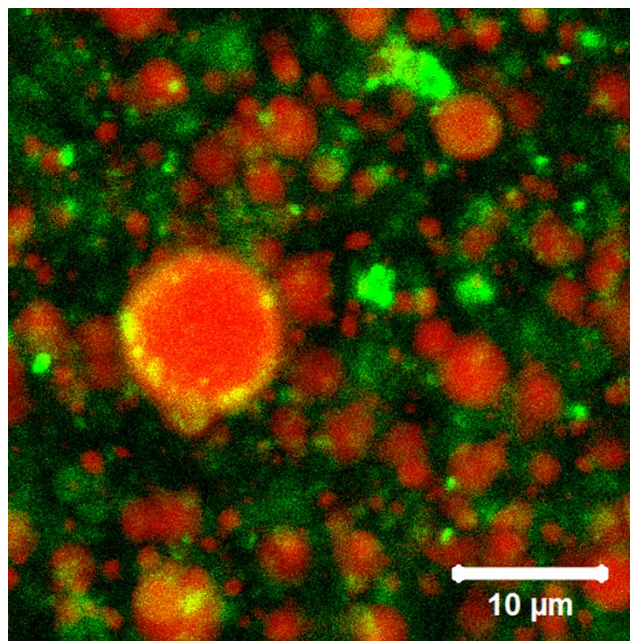

**Figure S1.** CLSM image of the cream collected after centrifuging the emulsion titrated to pH 6.4.

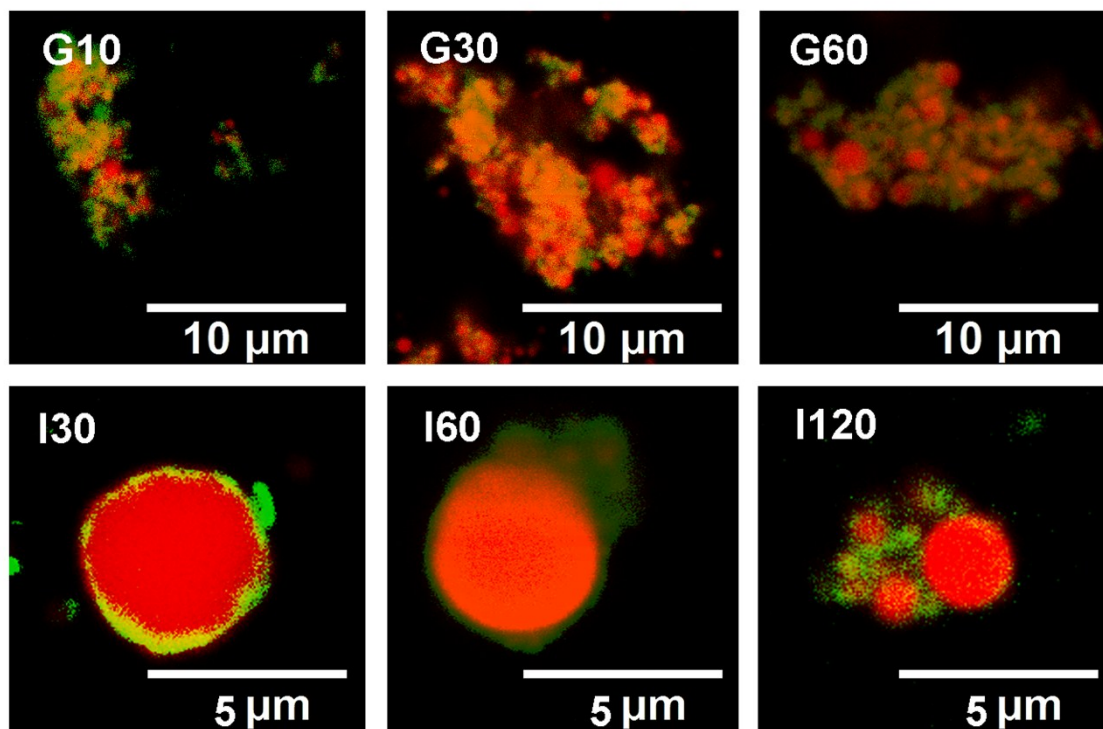

**Figure S2.** CLSM micrographs of the emulsion prepared at pH 6.6 after treatment in a simulated gastric juice for 10 (G10), 30 (G30), and 60 min (G60), as well as the same emulsion treated in the gastric juice for 2 h and subsequently treated in a simulated intestinal juice for 30 (I30), 60 (I60) and 120 min (I120).

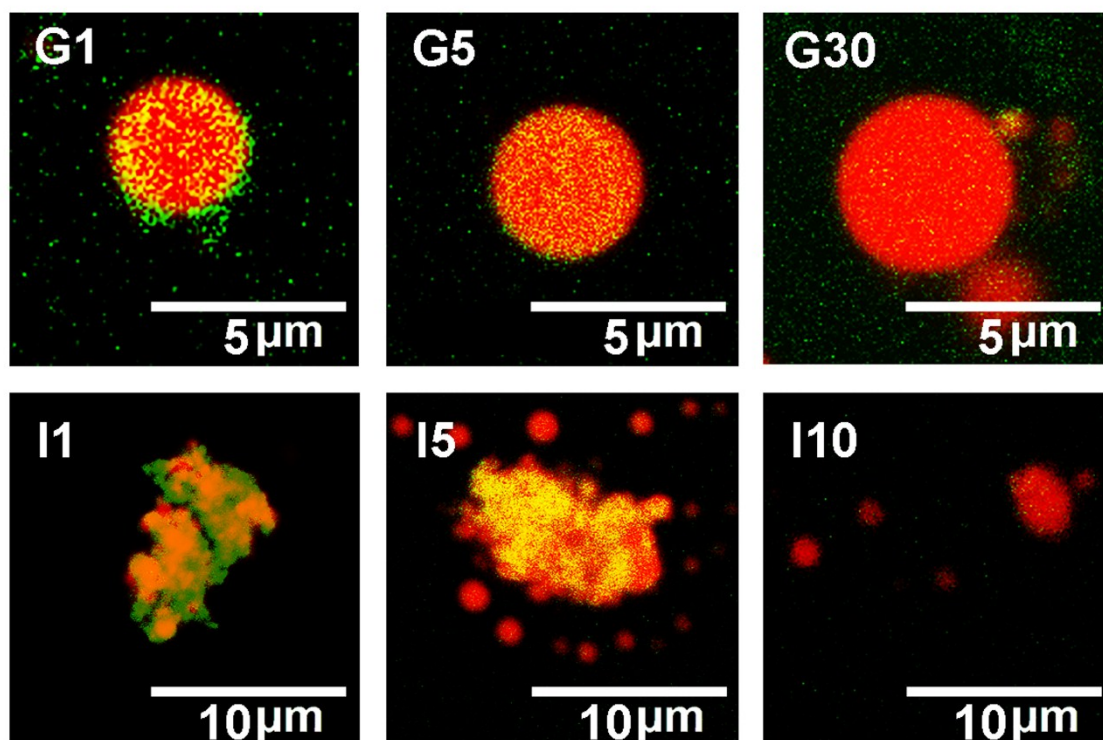

**Figure S3.** CLSM micrographs of the emulsion prepared at pH 6.2 after treatment in a simulated gastric juice for 1 (G1), 5 (G5), and 30 min (G30), as well as the same emulsion treated in the gastric juice for 2 h and subsequently treated in a simulated intestinal juice for 1 (I1), 5 (I5), and 10 min (I10).

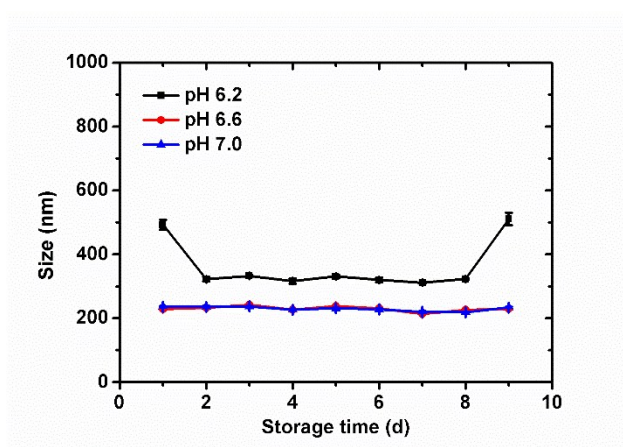

**Figure S4.** Hydrodynamic diameters of emulsion samples prepared at pH 6.2, 6.6, and 7.0 during storage at room temperature.
